# Supplementary material for: How Much Sugar is in My Drink? The Power of Visual Cues
Source: MDPI journal article supplement (doi:10.3390/nu12020394), 2020-02-02
Supplement: s1 [file s1]

## Supplementary Materials

Please answer the following questions based on what you observed today at the nutrition and sugar display.

### Item #1: Organic Horizon Low-fat Chocolate Milk

- 1.) If you consume chocolate milk, **how many times a week** do you drink it (put 0 if you never consume it or don't like it) \_\_\_\_\_?
- 2.) What **proportion** of this beverage is sugar (e.g., if a drink contains  $\frac{1}{2}$  a cup of sugar, and  $\frac{1}{2}$  cup of milk, the beverage would be  $\frac{1}{2}$  or 50% sugar)?

**Organic Horizon Low-fat Chocolate Milk is \_\_\_\_\_% Sugar**

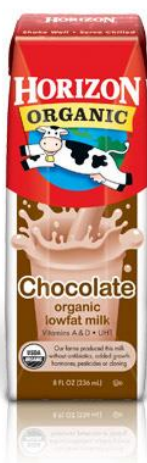

|                                   | Not Healthy |    |    |    | Somewhat Healthy |    |    |    |    | Extremely Healthy |     |
|-----------------------------------|-------------|----|----|----|------------------|----|----|----|----|-------------------|-----|
| 3.) How HEALTHY is this beverage? | 0           | 10 | 20 | 30 | 40               | 50 | 60 | 70 | 80 | 90                | 100 |

|                                                                                           | Does Not Meet Them |    |    |    | Meets Some Requirements |    |    |    |    | Meets them Extremely Well |     |
|-------------------------------------------------------------------------------------------|--------------------|----|----|----|-------------------------|----|----|----|----|---------------------------|-----|
| 4.) How well does the beverage meet nutritional requirements/how NUTRITIOUS is the drink? | 0                  | 10 | 20 | 30 | 40                      | 50 | 60 | 70 | 80 | 90                        | 100 |

- 5.) How many teaspoons of sugar are in this drink? \_\_\_\_\_teaspoons
- 6.) How many minutes of brisk walking (3.5 mph) would it take to burn off the calories from consuming this drink (assume you are drinking the **ENTIRE** bottle, which may contain more than one serving size)?  
\_\_\_\_\_ minutes
- 7.) How confident are you in your answer?

50% 60% 70% 80% 90% 100%  
just guessing absolutely sure

**Figure S1.** Questions About Drinks.

Please answer each question as accurately and truthfully as possible. ALL responses are ANONYMOUS and confidential - there will be no way to link your responses to these questions back to you.

Thank you again so much for your time and help!!

- 1.) What is your height in feet and inches (e.g., 5'6")?  
\_\_\_\_\_feet \_\_\_\_\_inches
- 2.) What is your weight in pounds? \_\_\_\_\_ lbs
- 3.) What is your age? \_\_\_\_\_
- 4.) What is your gender (circle one)? Male Female
- 5.) What is the highest level of education you have completed?
  - a. Less than High School
  - b. High School/GED
  - c. Some College
  - d. 2-year College Degree
  - e. 4-year College Degree
  - f. Master's Degree
  - g. Doctoral Degree
  - h. Professional Degree (JD, MD)
- 6.) What is your employment status?
  - a. Student
  - b. Employed
  - c. Not employed
  - d. Disability
  - e. Homemaker
  - f. Retired
  - g. Other \_\_\_\_\_
- 7.) Are you currently dieting? YES NO
- 8.) Do you follow a particular diet (circle one)?
  - a. N/A
  - b. Weight Watchers, Mediterranean diet, Paleolithic diet, Vegetarian, Vegan, Atkins diet, South Beach, Zone diet, Dr. Oz diet.
  - c. Other: \_\_\_\_\_
- 9.) What is your annual income range?
  - a. Below \$20,000
  - b. \$20,000 - \$29,999
  - c. \$30,000 - \$39,999
  - d. \$40,000 - \$49,999
  - e. \$50,000 - \$59,999
  - f. \$60,000 - \$69,999
  - g. \$70,000 - \$79,999
  - h. \$80,000 - \$89,999
  - i. \$90,000 or more
- 10.) What is your race?
  - a. White/Caucasian
  - b. African American
  - c. Hispanic
  - d. Asian
  - e. Native American
  - f. Pacific Islander
  - g. Other \_\_\_\_\_

Please Circle Your Answer Below:

|                                                                                                                   | Never |    |    |    |    | Half the time |    |    |    | All the Time |      |
|-------------------------------------------------------------------------------------------------------------------|-------|----|----|----|----|---------------|----|----|----|--------------|------|
| 11.) Do you snack?                                                                                                | 0%    | 10 | 20 | 30 | 40 | 50%           | 60 | 70 | 80 | 90           | 100% |
| 12.) Do you eat healthy foods?                                                                                    | 0%    | 10 | 20 | 30 | 40 | 50%           | 60 | 70 | 80 | 90           | 100% |
| 13.) Do you have regular meals (breakfast, lunch, dinner)?                                                        | 0%    | 10 | 20 | 30 | 40 | 50%           | 60 | 70 | 80 | 90           | 100% |
| 14.) Are you concerned with healthy eating?                                                                       | 0%    | 10 | 20 | 30 | 40 | 50%           | 60 | 70 | 80 | 90           | 100% |
| 15.) How often do you use the Nutrition Facts Panel when you consider whether to purchase or consume a food item? | 0%    | 10 | 20 | 30 | 40 | 50%           | 60 | 70 | 80 | 90           | 100% |

15.) How often do you eat meals outside of your home (delivery, carryout, or dining out)?

- a. Never
- b. Less than once a month
- c. 1-3 times a month
- d. Once a week
- e. 2-3 times a week
- f. 4-5 times a week
- g. More than 5 times a week

16.) Do you have health issues or other dietary/religious restrictions that affect your food choices (e.g., diabetes, allergies)?

YES NO

17.) If YES, please circle all that apply:

- a. Diabetes/pre-diabetic
- b. Allergies
- c. High blood pressure
- d. High blood cholesterol
- e. High blood triglycerides
- f. Genetic disorder
- g. Religious restrictions
- h. Vegan
- i. Vegetarian
- j. Gluten intolerant
- k. Other: Please describe: \_\_\_\_\_

Please Circle Your Answer Below:

|                                                                       | Sick, very unhealthy |    |    |    |    |    |    |    |    | Perfect Health |     |
|-----------------------------------------------------------------------|----------------------|----|----|----|----|----|----|----|----|----------------|-----|
| 18.) Overall, how healthy do you believe you are at the present time? | 0                    | 10 | 20 | 30 | 40 | 50 | 60 | 70 | 80 | 90             | 100 |

19.) What information on a food package do you tend to read/look for (choose all that apply)?

- a. Health claims (e.g., 100% whole grains, low sodium, American Heart Association (AHA) approved)
- b. Ingredients
- c. Nutrition Facts Panel
- d. GMO (genetically modified organism)
- e. Organic
- f. Local
- g. Picture/image of item
- h. Games/entertainment
- i. Expiration data
- j. Instructions for consumption/use
- k. other \_\_\_\_

20.) If you use the Nutrition Facts Panel when evaluating a product, which nutrient information do you consider to be **the most important** in making your decision?

Please **RANK** the following with 1 = most important to 14 = least important. If you don't use the Nutrient Facts Panel, please select the information you think should be the most important in making a decision. **PLEASE USE EACH NUMBER ONLY ONCE!**

- \_\_\_calories
- \_\_\_calories from fat
- \_\_\_total fat
- \_\_\_saturated fat
- \_\_\_trans fat
- \_\_\_poly/monounsaturated fats
- \_\_\_carbohydrates
- \_\_\_cholesterol
- \_\_\_sodium
- \_\_\_fiber
- \_\_\_sugar
- \_\_\_protein
- \_\_\_vitamins
- \_\_\_additives (e.g., BHT, Carmel color, food coloring, hydrogenated oils)

21.) Did you use the Nutrition Facts Panel when evaluating food items in **THIS** study?  
 YES      NO

22.) If you used the Nutrition Facts Panel in **THIS** study, did you focus on some nutrients more than others?

If so, please **RANK** the importance of the nutrients you **focused on for this study** from 1 = most important to 14 = least important. If you did not use the Nutrient Facts Panel, please select the information you think should be the most important in making a decision for the items in THIS study. **PLEASE USE EACH NUMBER ONLY ONCE!**

- \_\_\_calories
- \_\_\_calories from fat
- \_\_\_total fat
- \_\_\_saturated fat
- \_\_\_trans fat
- \_\_\_poly/monounsaturated fats
- \_\_\_carbohydrates
- \_\_\_cholesterol

- \_\_\_sodium
- \_\_\_fiber
- \_\_\_sugar
- \_\_\_protein
- \_\_\_vitamins
- \_\_\_additives (e.g., BHT, Carmel color, food coloring, hydrogenated oils)

23.) What do you believe the purpose of this study was?

---



---



---

24.) What do you believe would have the greatest impact on your decision to purchase a food or drink item (please select all that apply)?

- a. Hunger/thirst at the time.
- b. Price reduction (e.g., Low sugar items are 15% off).
- c. Price Bonus (e.g., get an extra amount of money for each healthy item you purchase).
- d. Visual educational material (e.g., display showing how much sugar or fat is contained in an item).
- e. Nutritional education material (e.g., display with experts talking about the negative health effects of sugar).
- f. Information on how many calories you would have to burn if you consumed the item ( e.g., you would have to walk for 40 min to burn off the calories consumed in one serving of Kashi Strawberry Fields cereal).

Other \_\_\_\_\_

---



---



---

**Figure S2.** demographic questionnaire.

- 1.→Experts advise that people eat 3 servings of fruit and vegetables a day (One serving could be, for example, an apple or a handful of chopped carrots). ¶  
[True/False]¶
- 2.→The most important fat for people to cut down on is monounsaturated fat. ¶  
[True/False]¶
- 3.→Some foods contain a lot of fat but no cholesterol. ¶  
[True/False]¶
- 4.→A glass of unsweetened fruit juice counts as a helping of fruit. ¶  
[True/False]¶
- 5.→Saturated fats are mainly found in dairy products. ¶  
[True/False]¶
- 6.→Brown sugar is a healthy alternative to white sugar. ¶  
[True/False]¶
- 7.→There is more protein in a glass of whole milk than in a glass of skimmed milk. ¶  
[True/False]¶
- 8.→Polyunsaturated margarine contains less fat than butter. ¶  
[True/False]¶
- 9.→White bread contains more vitamins and minerals than brown or whole grain bread. ¶  
[True/False]¶
- 10.→Butter is higher in calories than regular margarine. ¶  
[True/False]¶
- 11.→Coconut oil contains mostly monounsaturated fat. ¶  
[True/False]¶
- 12.→Polyunsaturated fats are mainly found in vegetable oils. ¶  
[True/False]¶

Figure S3. Nutrition Questions

- 1.) If you could have any of these drinks to consume RIGHT NOW, which would you choose (please circle all that apply)?
- NONE, I do not like, consume or purchase any of these beverages.
  - Organic Horizon Low-fat Chocolate Milk
  - Pepsi
  - Monster Energy Drink
  - Starbucks Frappuccino Mocha (Low-fat)
  - Diet Snapple Lemonade Iced Tea Half n' Half
  - Coca Cola
  - Odwalla Mango Tango Fruit Smoothie Blend
  - Sprite
  - Simply Orange Juice
  - Red Bull
  - Gatorade Lemon-Lime G2 Thirst Quencher
- 2.) How many POUNDS per year would you gain if you consumed one extra can of a soft drink or other sugary beverage ( e.g., 10 teaspoons of sugar, 150 calories) a day?
- \_\_\_\_\_pounds
- 3.) How many teaspoons of sugar should you consume per day based on the 2000 calorie guidelines?
- \_\_\_\_\_ teaspoons

|                                    | Not thirsty at all |    |    |    |    |    |    |    |    | Parched, dying of thirst |     |
|------------------------------------|--------------------|----|----|----|----|----|----|----|----|--------------------------|-----|
| 4.) How thirsty are you RIGHT NOW? | 0                  | 10 | 20 | 30 | 40 | 50 | 60 | 70 | 80 | 90                       | 100 |

- 5.) Which drinks shown here are the healthiest? Please rank the drinks from 1 = Healthiest to 11 = Least Healthy. **PLEASE USE EACH NUMBER ONLY ONCE!**

- \_\_\_\_Organic Horizon Low-fat Chocolate Milk)
- \_\_\_\_Pepsi
- \_\_\_\_Monster Energy Drink
- \_\_\_\_Starbucks Frappuccino Mocha (Low-fat)
- \_\_\_\_Diet Snapple Lemonade Iced Tea Half n' Half
- \_\_\_\_Coca Cola
- \_\_\_\_Odwalla Mango Tango Fruit Smoothie Blend
- \_\_\_\_Sprite
- \_\_\_\_Simply Orange Juice
- \_\_\_\_Red Bull
- \_\_\_\_Gatorade Lemon-Lime G2 Thirst Quencher

|                                                           | Not at all important |    |    |    |    |    |    |    | Most important nutrient to consider |    |     |
|-----------------------------------------------------------|----------------------|----|----|----|----|----|----|----|-------------------------------------|----|-----|
| 6.) How important is sugar to an items overall nutrition? | 0                    | 10 | 20 | 30 | 40 | 50 | 60 | 70 | 80                                  | 90 | 100 |

- 7.) What beverages do you most often consume, and how often do you consume them during a week (e.g., Orange Juice, 6 glasses a week)?
- \_\_\_\_\_

Please View the Following Information and then Answer **TWO** Questions



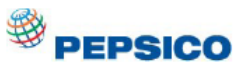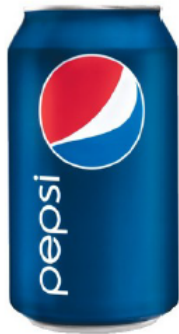

## Pepsi

Type: Bottles, Cans and Cartons

Size: 12 fl oz

### Nutrition Info:

| Serving size 1 container | Per Container |      |
|--------------------------|---------------|------|
|                          | 12 fl oz      | %DV* |
| Calories                 | 150           | -    |
| Total Fat (g)            | 0             | 0    |
| Sodium (mg)              | 30            | 1    |
| Total Carbs (g)          | 41            | 14   |
| Sugars (g)               | 41            | -    |
| Protein (g)              | 0             | -    |

Not a significant source of other nutrients.

\*Percent Daily Values (DV) are based on a 2,000 calorie diet.

Calorie and nutrient values are rounded as required by the Food & Drug Administration. This can produce irregularities among sizes. Product may not be available in all areas.

### Ingredients:

CARBONATED WATER, HIGH FRUCTOSE CORN SYRUP, CARAMEL COLOR, SUGAR, PHOSPHORIC ACID, CAFFEINE, CITRIC ACID, NATURAL FLAVOR

www.pepsicobeveragefacts.com  
Last Updated May 24, 2013

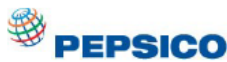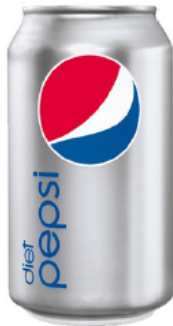

## Diet Pepsi

Type: Bottles, Cans and Cartons

Size: 12 fl oz

### Nutrition Info:

| Serving size 1 container | Per Container |      |
|--------------------------|---------------|------|
|                          | 12 fl oz      | %DV* |
| Calories                 | 0             | -    |
| Total Fat (g)            | 0             | 0    |
| Sodium (mg)              | 35            | 2    |
| Total Carbs (g)          | 0             | 0    |
| Sugars (g)               | 0             | -    |
| Protein (g)              | 0             | 0    |

Not a significant source of other nutrients.

\*Percent Daily Values (DV) are based on a 2,000 calorie diet.

Calorie and nutrient values are rounded as required by the Food & Drug Administration. This can produce irregularities among sizes. Product may not be available in all areas.

### Ingredients:

CARBONATED WATER, CARAMEL COLOR, ASPARTAME, PHOSPHORIC ACID, POTASSIUM BENZOATE (PRESERVES FRESHNESS), CAFFEINE, CITRIC ACID, NATURAL FLAVOR, ACESULFAME POTASSIUM

8.) Which of these items is the HEALTHIER choice?

Pepsi

Diet Pepsi

9.) Which is lower in SUGAR?

Pepsi

Diet Pepsi

Figure S4. Overall Questions.
